RESEARCH ARTICLE

# Polymorphisms of *FST* gene and their association with wool quality traits in Chinese Merino sheep

Guang-Wei Ma<sup>1,2,3</sup>, Yan-Kai Chu<sup>1,2,3</sup>, Wen-Jian Zhang<sup>1,2,3</sup>, Fei-Yue Qin<sup>1,2,3</sup>, Song-Song Xu<sup>1,2,3</sup>, Hua Yang<sup>4</sup>, En-Guang Rong<sup>5</sup>, Zhi-Qiang Du<sup>1,2,3</sup>, Shou-Zhi Wang<sup>1,2,3</sup>, Hui Li<sup>1,2,3</sup>, Ning Wang<sup>1,2,3\*</sup>

**1** Key Laboratory of Chicken Genetics and Breeding, Ministry of Agriculture, Harbin, P. R. China, **2** Key Laboratory of Animal Genetics, Breeding and Reproduction, Education Department of Heilongjiang Province, Harbin, P. R. China, **3** College of Animal Science and Technology, Northeast Agricultural University, Harbin, P. R. China, **4** Institute of Animal Husbandry and Veterinary Medicine, Xinjiang Academy of Agricultural and Reclamation Science, Shihezi, P. R. China, **5** State Key Laboratory of Agrobiotechnology, China Agricultural University, Beijing, P. R. China

\* wangning@neau.edu.cn

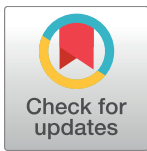

**OPEN ACCESS**

**Citation:** Ma G-W, Chu Y-K, Zhang W-J, Qin F-Y, Xu S-S, Yang H, et al. (2017) Polymorphisms of *FST* gene and their association with wool quality traits in Chinese Merino sheep. PLoS ONE 12(4): e0174868. <https://doi.org/10.1371/journal.pone.0174868>

**Editor:** Juan J Looor, University of Illinois, UNITED STATES

**Received:** September 24, 2016

**Accepted:** March 16, 2017

**Published:** April 6, 2017

**Copyright:** © 2017 Ma et al. This is an open access article distributed under the terms of the [Creative Commons Attribution License](https://creativecommons.org/licenses/by/4.0/), which permits unrestricted use, distribution, and reproduction in any medium, provided the original author and source are credited.

**Data Availability Statement:** All relevant data are within the paper and its Supporting Information files.

**Funding:** This study was supported by Domain-Specific projects for transgenic biological breeding (2014ZX08009-002 and 2009ZX08009-160B), The National High Technology Research and Development Program of China (863 program) (grant no. 2013AA102506) and Postgraduate Technology Innovation Project of Northeast Agricultural University (yjscx14006).

## Abstract

Follistatin (*FST*) is involved in hair follicle morphogenesis. However, its effects on hair traits are not clear. This study was designed to investigate the effects of *FST* gene single nucleotide polymorphisms (SNP) on wool quality traits in Chinese Merino sheep (Junken Type). We performed gene expression analysis, SNP detection, and association analysis of *FST* gene with sheep wool quality traits. The real-time RT-PCR analysis showed that *FST* gene was differentially expressed in adult skin between Chinese Merino sheep (Junken Type) and Suffolk sheep. Immunostaining showed that *FST* was localized in inner root sheath (IRS) and matrix of hair follicle (HF) in both SF and Suffolk sheep. Sequencing analysis identified a total of seven SNPs (termed SNPs 1–7) in the *FST* gene in Chinese Merino sheep (Junken Type). Association analysis showed that SNP2 (Chr 16. 25,633,662 G>A) was significantly associated with average wool fiber diameter, wool fineness SD, and wool crimp ( $P < 0.05$ ). SNP4 (Chr 16. 25,633,569 C>T) was significantly associated with wool fineness SD and CV of fiber diameter ( $P < 0.05$ ). Similarly, the haplotypes derived from these seven identified SNPs were also significantly associated with average wool fiber diameter, wool fineness SD, CV of fiber diameter, and wool crimp ( $P < 0.05$ ). Our results suggest that *FST* influences wool quality traits and its SNPs 2 and 4 might be useful markers for marker-assisted selection and sheep breeding.

## Introduction

Sheep (*Ovis aries*) play an important role in the global agriculture economy being one of the earliest domesticated animal. Sheep are raised for wool, meat, skin and milk. A number of sheep breeds have been bred for different purposes. The Merino is an old and influential sheep

**Competing interests:** The authors have declared that no competing interests exist.

breed, and Merino wool is the finest and softest wool obtained from sheep. Chinese Merino sheep (Junkun Type) breeding started in 1972 and, to date, six strains of Chinese Merino sheep (Junkun Type) have been developed for various purposes: the superfine wool strain (SF), the prolific wool strain (PW), the prolific meat strain (PM), and strains A, B, and U [1]. Strain A was selected for large body size and high wool yield, strain B was selected for long wool fiber, and strain U was selected for long wool fiber, high wool yield, and lower fiber diameter [1].

Wool quality traits are polygenic traits, and several of genes have been reported to be associated with sheep wool quality traits. Two SNPs in keratin-associated protein 8.1 (*KAP 8.1*) gene and one SNP in keratin-associated protein 1.3 (*KAP 1.3*) gene were shown to be associated with average wool fiber diameter in Chinese Merino sheep [2]. A 57-bp deletion of keratin-associated protein 6.1 (*KAP 6.1*) gene was associated with wool fineness SD and CV of fiber diameter in Southdown × Merino cross lambs [3]. Two SNPs in keratin-associated protein 22.1 (*KAP 22.1*) gene and six SNPs in desmoglein 4 (*DSG 4*) gene were shown to influence wool crimp in Southdown × Merino cross lambs and Tan sheep, respectively [4, 5]. In addition, our previous study showed that nine SNPs of methionine synthase (*MTR*) gene were associated with average wool fiber diameter in Chinese Merino sheep [6].

Follistatin (*FST*) was first isolated from bovine and porcine ovarian follicular fluid in 1987 [7, 8]. *FST* gene is located on human chromosome 5, mouse chromosome 13, cow chromosome 20, and sheep chromosome 16. Ovine *FST* gene is a relatively small gene consisting of six exons spanning around 6 kb of genomic region and encodes two protein isoforms due to the alternative splicing: *FST344* and *FST317*. Signal peptide removal of *FST344* and *FST317* yields mature polypeptides of 315 (*FST315*) and 288 (*FST288*), respectively. As a secreted glycoprotein, *FST* inhibits activin activity by two mechanisms. First, *FST288* binds to activin at the membrane surface to form the follistatin/activin complex, and then this complex is endocytosed and degraded by the lysosome. Second, *FST315* binds to activin and prevents activin binding to its receptors [9, 10].

*FST* is widely expressed in mammalian tissues and organs, such as ovary, skin, and skeletal muscle [9, 11, 12]. *In situ* hybridization analysis showed that *FST* gene transcript was expressed in hair placode, outer root sheath, and interfollicular epidermis in mouse embryonic hair follicles [13]. Further immunostaining showed that the *FST* was expressed in the hair placode, matrix, and inner root sheath as well as the interfollicular epidermis in mouse embryonic hair follicles [13]. It has been shown that *FST* is involved in the regulation of hair follicle morphogenesis. Knockout mouse studies showed that homozygous *FST* knockout mice died shortly after birth because of impaired lung development [14]. Histological analysis showed that, at 18.5 days post coitus, *FST* knockout embryos had a higher percentage of hair follicles in the early stages (stages 1 and 2) and a lower percentage of hair follicles in more advanced stages (stages 3 and 4) in the back skin, compared with their littermate control embryos [13], indicating that *FST* knockout retards mouse hair follicle morphogenesis. Compared with their littermate control, the homozygous *FST* knockout newborn mice had curlier whiskers [14]. A transgenic mouse study showed that compared with their littermate control, *FST* transgenic mice had normal body weight and body size, but shinier and more irregular hair [15]. Furthermore, an epidermis-specific transgenic overexpression of *FST* caused thinner epidermis, smaller hair follicles, and more irregular hair [16].

Although it has been demonstrated that *FST* regulates hair follicle morphogenesis [13], its effects on hair traits are not clear. Here, to study the effects of *FST* gene on hair traits, we performed gene expression analysis as well as single nucleotide polymorphisms detection followed by association analysis of *FST* gene with sheep wool quality traits in Chinese Merino sheep (Junkun Type).

## Materials and methods

### Ethics statement

All animal work was conducted according to the guidelines for the care and use of experimental animals established by the Ministry of Science and Technology of the People's Republic of China (Approval number: 2006–398), and was approved by the Laboratory Animal Management Committee of Northeast Agricultural University.

### Animal resource population and phenotyping

A total of 744 Chinese Merino sheep (Junken Type) were used in this study, from the Xinjiang Academy of Agricultural and Reclamation Science. These sheep were from six strains of Chinese Merino sheep (Junken Type) (strain **A** (n = 152), strain **B** (n = 103), the prolific meat strain (**PM**, n = 134), the prolific wool strain (**PW**, n = 138), the superfine wool strain (**SF**, n = 181) and strain **U** (n = 36)). Strain **A** was selected for large body size and high wool yield, strain **B** was selected for long wool fiber, and strain **U** was selected for long wool fiber, high wool yield, and lower fiber diameter [1]. In addition, sixteen ewes (eight from each of **SF** and Suffolk sheep) were used for *FST* gene expression analysis. Of these sixteen sheep, the three **SF** strain sheep were slaughtered at 240 d of age, and the body side skin, skeletal muscle, small intestine, ovary, heart, liver, spleen, pituitary gland, kidney, rumen, and pineal gland samples were collected and other five **SF** strain sheep were slaughtered at 240 d of age for collecting only body side skin samples. The eight Suffolk sheep were slaughtered at 240 d of age for collecting only body side skin samples. All collected tissue samples were snap-frozen in liquid nitrogen and stored at  $-80^{\circ}\text{C}$  until analyzed. All sheep were kept in the same environmental conditions and had free access to feed and water. The ear notch samples and wool samples were collected at shearing. The wool quality traits were measured following the guidelines of the China Fiber Inspection Bureau and International Wool Textile Organization [17]. A total of five traits were measured and recorded: average wool fiber diameter, wool fineness SD, CV of fiber diameter, wool crimp, and wool fiber length.

### DNA and RNA extraction and cDNA synthesis

Genomic DNA from the 744 samples was isolated from ear tissue samples using the phenol–chloroform method and stored at  $-20^{\circ}\text{C}$  for genotyping [18]. Total RNA from the frozen tissues was isolated with Trizol reagent (Invitrogen, Rockville, MD) according to the instructions, and RNA quality was assessed by denaturing formaldehyde agarose gel electrophoresis. Total RNA (1  $\mu\text{g}$ ) was reverse transcribed to cDNA using Promega Improm-II reverse transcription System (Promega, Madison, WI) following the instructions.

### Real-time reverse transcription-PCR

Real-time Reverse Transcription-PCR (real-time RT-PCR) was performed on an Applied Biosystems 7500 Fast Real-Time PCR Systems (US) using the Taq SYBR<sup>®</sup> Green qPCR Premix (NOVA, Yugong Biolabs Inc., Lianyungang, Jiangsu, China). Thermal cycling consisted of an initial step at  $95^{\circ}\text{C}$  for 10 min followed by 40 cycles at  $95^{\circ}\text{C}$  for 30 s and  $60^{\circ}\text{C}$  for 30 s. The following primers were used: *FST* gene, forward primer: 5' -GCCGAATGAACAAGAAGAACAAA C-3' and reverse primer: 5' -TCAGGTGACAGGCACTGGGGTA-3' and *GAPDH* gene, forward primer: 5' -CTGACCTGCCGCTGGAGAAA-3' and reverse primer: 5' -GTAGAAGAGT GAGTGTCTCGCTGTT-3'. *FST* gene expression was quantified relative to *GAPDH* gene expression by the  $2^{-\Delta\text{Ct}}$ , where  $\Delta\text{Ct} = \text{Ct}_{\text{FST}} - \text{Ct}_{\text{GAPDH}}$ . *GAPDH* gene was served as internal standard for normalization. Data were analyzed with SAS 8.0, in which a *t*-test or ANOVA procedure to

examine the significance of difference in gene expression. *P*-value < 0.05 was considered as statistically significant and *P*-value < 0.01 was considered as highly significant, unless otherwise specified.

### Histology and immunostaining

The body side skin was collected from six ewes (three from each of SF and Suffolk sheep). Skin samples were fixed in 10% neutral-buffered formalin, embedded in paraffin, sectioned, and stained with hematoxylin and eosin. Paraffin embedded sections were stained following a standard immunohistochemical staining protocol. Paraffin sections (8 μm thick) were blocked with 10% goat serum (room temperature, 20 min), and were incubated overnight at 4 °C with polyclonal rabbit anti-human FST antibody (sc-30194, Lot #A1644, Santa Cruz Biotechnology, Inc.) at a 1:100 dilution. After rinsed in phosphate buffer saline, paraffin sections were incubated with biotin conjugated goat anti-rabbit IgG secondary antibody (BOSTER, China) at a 1:1000 dilution for 1 h at 37 °C. Labeling was visualized by DAB kit (BOSTER, China). The images were taken under a Nikon microscope (ECLIPSE 80i, Japan).

### Single nucleotide polymorphism detection in the ovine *FST* gene

In an effort to identify SNP in a cost-effective manner, SNP discovery was achieved by sequencing PCR products of the pooled DNA samples from 60 Chinese Merino sheep (Junkent Type) individuals. Two partial regions (1280 bp and 2101 bp) of the *FST* gene were amplified by PCR using primer pairs FST-1 and FST-2, respectively (Table 1). The PCR products were purified and sequenced by Invitrogen (Shanghai, China). The sequences were aligned using the Align X function of Vector NTI (Informax, Rockville, MD). SNPs were identified by double peaks at a single base in the chromatograms.

### Genotyping of the ovine *FST* gene

A multiplexed SNP single base extension (SBE) assay was designed by using Sequenom Assay Design 3.1 software (Sequenom, San Diego, CA) according to the instructions. Genotyping was performed by using a 384-well plate format on the Sequenom MassARRAY platform (Bioyong Technologies Inc., Beijing, China) during the year 2012. The raw data files generated by Mass Array Sequenom were analyzed for the intensity peaks of calibrant to ascertain the quality of the data as previous described [19]. An overall call rate of >95% was maintained. For every 96 samples (a quadrant of the Sequenom chip), four samples were duplicated and the call rates were checked for concordance. The calls in the negative control (no DNA) were also monitored in all the runs. Reproducibility was 100% in the present study.

### Statistical analysis

Correlation analysis between *FST* gene expression in skin and average wool fiber diameter was subjected to the Pearson procedure of IBM SPSS 19.0 (US). Genotype and allele frequencies

**Table 1. Primers used for amplification of the ovine *FST* gene.**

| Primer pair | Primer sequence (5'-3')       | <i>FST</i> gene regions       | Amplified genomic position   | Product size |
|-------------|-------------------------------|-------------------------------|------------------------------|--------------|
| FST-1       | F: TCAGGTCCTGTACAAGACAGAAGCTG | Exons 2–4 and Introns 2 and 3 | Chr16: 25,632,658–25,633,937 | 1280 bp      |
|             | R: ACTGGGGTAGGTCACCTCCATCATT  |                               |                              |              |
| FST-2       | F: GACACTAAAGGTTCAACCTAGGGTC  | Introns 3–5 and Exons 4–6     | Chr16: 25,630,892–25,632,992 | 2101 bp      |
|             | R: TGTAGTCCTGGTCTTCATCTTCCTC  |                               |                              |              |

<https://doi.org/10.1371/journal.pone.0174868.t001>

were subjected to the Descriptive statistics of IBM SPSS 19.0 (US). The Hardy-Weinberg equilibrium using  $\chi^2$  test of each SNP was performed by IBM SPSS 19.0 (US). The expected heterozygosity and Shannon's information index ( $I$ ) were performed by the Popgene 32 software (Version 1.31). The polymorphism information content ( $PIC$ ) and observed heterozygosity were calculated according to the allele process of the SAS 9.1.3 genetics software package. The graphical representation of the Linkage disequilibrium (LD) structure was performed by the Haploview software (version 4.2). The haplotype analysis was conducted in SAS/GENETICS using the PROC HAPLOTYPE procedure with a sliding window (S1 Table). This procedure uses the Expectation Maximization (EM) algorithm to generate maximum likelihood estimates of the haplotype frequencies.

Before analyzing the association between the identified SNPs and wool quality traits, we performed the data preprocessing: if the number of one genotype was fewer than 5%  $\times$  the total number of samples, we removed the data for this genotype.

Based on the characteristics of Chinese Merino sheep (Junken Type), the statistical models were:

$$\text{Model 1 : } Y = \mu + G + L + A + G \times L + G \times A + A \times L + e,$$

$$\text{Model 2 : } Y = \mu + H + L + A + H \times L + H \times A + A \times L + e,$$

where  $Y$  is the phenotype value;  $\mu$  is the population mean; genotype ( $G$ ), haplotype ( $H$ ), line ( $L$ ), and age ( $A$ ) were the fixed effects;  $G \times L$ ,  $G \times A$ , and  $A \times L$  were the interaction effect of  $G$  by  $L$ ,  $G$  by  $A$ , and  $A$  by  $L$ ;  $H \times L$ ,  $H \times A$ , and  $A \times L$  were the interaction effect of  $H$  by  $L$ ,  $H$  by  $A$ , and  $A$  by  $L$ ; and  $e$  was the residual effect. Data were subjected to the GLM procedures of John's Macintosh Program 7.0 (JMP, SAS Inst. Inc., Cary, NC), which was used to examine the correlation between genotypes and haplotypes and continuous traits and to evaluate the least squares means.  $P$ -value  $< 0.05$  was considered statistically significant, and  $P$ -value  $< 0.01$  was highly significant, unless otherwise specified.

## Results

### Ovine *FST* gene expression

Merino and Suffolk are two different sheep breeds. There is a dramatic difference in average wool fiber diameter between the two sheep breeds [20]. Consistent with the known wool quality difference between Merino and Suffolk, our wool fiber measurement showed that the superfine wool strain (SF) Merino had lower average wool fiber diameter than Suffolk sheep (SF sheep: 17.58  $\mu\text{m}$ ; Suffolk: 30.92  $\mu\text{m}$ ;  $P = 0.0009$ ; Fig 1A). To obtain the clue for understanding the effects of *FST* gene on sheep wool quality traits, we performed the tissue expression analysis of *FST* gene in SF sheep and Suffolk sheep by real-time RT-PCR. The results showed that *FST* gene was ubiquitously expressed in the eleven tested adult tissues of SF sheep (Fig 1B), and comparatively highly expressed in the body side skin and ovary (Fig 1B). Skin expression comparison revealed that *FST* gene expression was 4.15-fold lower in SF sheep than in Suffolk sheep ( $P < 0.05$ ; Fig 1C). Correlation analysis showed that skin *FST* gene expression was positively significantly correlated to the average wool fiber diameter (Pearson's  $r = 0.987$ ,  $P < 0.05$ ), suggesting that *FST* gene expression variation may contribute to the variation of wool quality traits between SF sheep and Suffolk sheep. Immunohistochemical localization showed that *FST* was localized in inner root sheath (IRS) and matrix of hair follicle (HF) in both SF and Suffolk sheep (Fig 1D and 1E).

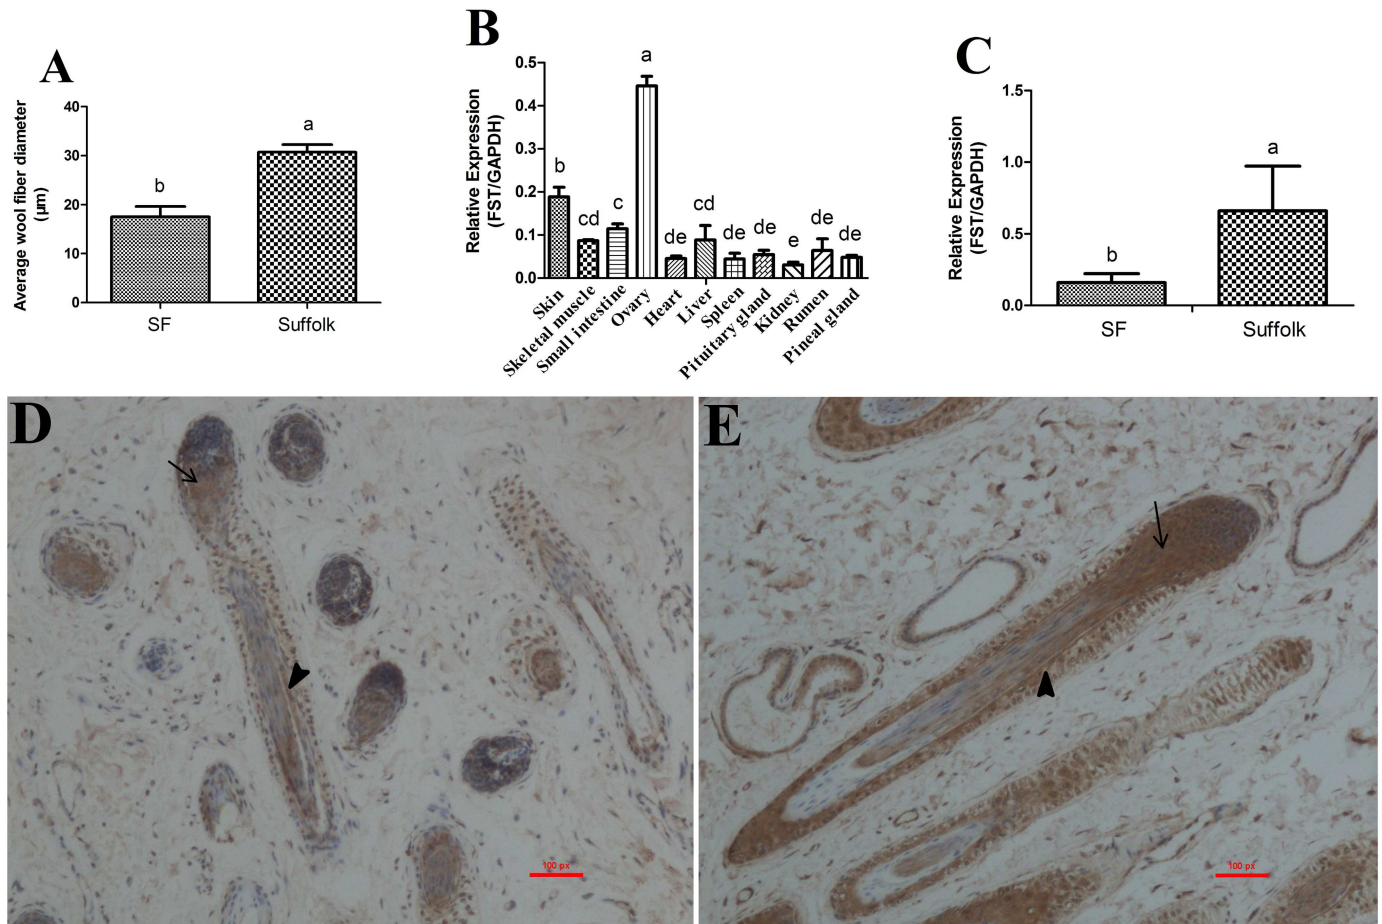

**Fig 1. Ovine *FST* gene expression.** (A) The average wool fiber diameter of SF (n = 3) and Suffolk (n = 3) sheep. In a row with different superscripts differ significantly ( $P < 0.05$ ). (B) The *FST* gene expression in various tissues of the SF sheep (n = 3). The housekeeping gene *GAPDH* was used as an internal control for real-time RT-PCR analysis. In a row with different superscripts differ significantly ( $P < 0.05$ ). (C) The *FST* gene expression levels in the body side skin between SF (n = 8) and Suffolk (n = 8). The housekeeping gene *GAPDH* was used as an internal control for real-time RT-PCR analysis. In a row with different superscripts differ significantly ( $P < 0.05$ ). (D) Immunohistochemical localization of *FST* in SF sheep skin (n = 3). (E) Immunohistochemical localization of *FST* in Suffolk sheep skin (n = 3). The inner root sheath, arrowhead; matrix, arrow.

<https://doi.org/10.1371/journal.pone.0174868.g001>

## Identification of SNPs

Sequencing analysis identified a total of seven SNPs (termed SNPs 1–7) in the two overlapping fragments of the ovine *FST* gene in Chinese Merino sheep (Junken Type). Of these seven SNPs, four (SNPs 1–4) were located in intron 2 of the *FST* gene, one (SNP5, S216T) was located in exon 4, and two (SNPs 6 and 7) were located in intron 4. The nomenclature and distribution of the seven identified SNPs were presented in Table 2.

## Frequency of alleles and genotypes

We genotyped these seven identified SNPs in 744 individuals of six Chinese Merino sheep (Junken Type) strains (A, B, PM, PW, SF and U) using the SBE assay. In the tested population, three genotypes were found for each of these seven identified SNPs (S2 Table). The MAF of these seven SNPs ranged from 4.76% to 41.83% (Table 3). The observed heterozygosities and expected heterozygosity of these seven SNPs ranged from 0.0237 to 0.4533 and 0.0907 to 0.4867, respectively. Except SNP6, the observed heterozygosities of all other SNPs were lower

**Table 2. Summary of the seven identified SNPs in ovine *FST* gene.**

| SNP ID <sup>1</sup> | Chromosome position <sup>2</sup> , bp | Locations | db SNP rs # ID <sup>3</sup> | AA exchange |
|---------------------|---------------------------------------|-----------|-----------------------------|-------------|
| SNP1                | Chr 16. 25,633,722                    | Intron 2  | rs403714633                 |             |
| SNP2                | Chr 16. 25,633,662                    | Intron 2  | rs425207127                 |             |
| SNP3                | Chr 16. 25,633,632                    | Intron 2  | rs401759231                 |             |
| SNP4                | Chr 16. 25,633,569                    | Intron 2  | rs423028521                 |             |
| SNP5                | Chr 16. 25,632,659                    | Exon 4    | rs161143581                 | S216T       |
| SNP6                | Chr 16. 25,632,504                    | Intron 4  | rs598552142                 |             |
| SNP7                | Chr 16. 25,632,294                    | Intron 4  | rs403563544                 |             |

<sup>1</sup> ID = identifier.

<sup>2</sup> Nucleotides are numbered according to the *Ovis aries* genome ([ISGC Oar\_v3.1/oviAri3], <http://genome.ucsc.edu/cgi-bin/hgBlat>) and located on chromosome 16 at 25,630,892 to 25,633,937 bp, bp = base pair.

<sup>3</sup> db = database; rs# = reference SNP #.

<https://doi.org/10.1371/journal.pone.0174868.t002>

than the expected heterozygosity (Table 3). The allele frequencies observed for the seven identified SNPs in the six tested strains were summarized in S2 Table. The polymorphism information content (*PIC*) analysis showed that at species level, SNPs 1–3, SNPs 5 and 6 were in low diversity ( $PIC < 0.25$ ), and SNPs 4 and 7 were in moderate diversity ( $0.25 < PIC < 0.5$ ) (Table 4), but at population level, except SNP7 which was in moderate diversity ( $0.25 < PIC < 0.5$ ), the other six SNPs were almost in low diversity ( $PIC < 0.25$ ) (Table 4). We also performed the Shannon’s information index (*I*) test for the seven identified SNPs in the six tested strains (Table 5). The results showed that, compared to other six SNPs, SNP7 had the largest *I* score at species and population levels, suggesting that the tested population had high genetic diversity based on SNP7 data (Table 5). Statistical analysis showed that the *PIC* was positively significantly correlated with the *I* score (Pearson’s  $r = 0.999$ ,  $P < 0.05$ ). The  $\chi^2$  test showed that among these seven identified SNPs, SNPs 2 and 3 were not in Hardy-Weinberg equilibrium based on the combined data (Table 3,  $P < 0.05$ ).

### Association of SNPs in the *FST* gene with wool quality traits

Using JMP 7.0, we analyzed the association between the identified SNPs and wool quality traits using the linear model 1. As shown in Table 6, in the tested Chinese Merino sheep (Junken Type) population tested, SNP2 was significantly associated with the average wool fiber

**Table 3. Summarized information for the seven identified SNPs in ovine *FST* gene.**

| SNP ID | Alleles | MAF <sup>1</sup> | Het.Obs. <sup>2</sup> | Het.Exp. <sup>3</sup> | HW <sup>4</sup> P-value  |
|--------|---------|------------------|-----------------------|-----------------------|--------------------------|
| SNP1   | G / A   | 0.0628           | 0.1093                | 0.1178                | 0.0510                   |
| SNP2   | G / A   | 0.1950           | 0.0237                | 0.3139                | $2.089 \times 10^{-155}$ |
| SNP3   | A / C   | 0.0476           | 0.084                 | 0.0907                | 0.0494                   |
| SNP4   | C / T   | 0.1881           | 0.2969                | 0.3054                | 0.4475                   |
| SNP5   | C / G   | 0.0605           | 0.1073                | 0.1137                | 0.1274                   |
| SNP6   | G / A   | 0.0527           | 0.1027                | 0.0999                | 0.4371                   |
| SNP7   | C / T   | 0.4183           | 0.4533                | 0.4867                | 0.0935                   |

<sup>1</sup> MAF = minor allele frequency. A/B implies that B is the minor allele.

<sup>2</sup> Het.Obs. = Observed heterozygosity.

<sup>3</sup> Het.Exp. = Expected heterozygosity.

<sup>4</sup> HW = Hardy-Weinberg equilibrium.

<https://doi.org/10.1371/journal.pone.0174868.t003>

**Table 4. Polymorphism Information Content (PIC) for the seven identified SNPs in Chinese Merino sheep (Junken Type) population.**

| Strain           | SNP1   | SNP2   | SNP3   | SNP4   | SNP5   | SNP6   | SNP7   |
|------------------|--------|--------|--------|--------|--------|--------|--------|
| A                | 0.0382 | 0.1751 | 0.0263 | 0.0733 | 0.0390 | 0.0733 | 0.3501 |
| B                | 0.1435 | 0.2915 | 0.1291 | 0.1860 | 0.1491 | 0.0097 | 0.3386 |
| PM               | 0.2047 | 0.3188 | 0.1392 | 0.1491 | 0.1891 | 0.0434 | 0.3398 |
| PW               | 0.0923 | 0.1837 | 0.0813 | 0.3216 | 0.0929 | 0.2653 | 0.3744 |
| SF               | 0.0869 | 0.2983 | 0.0742 | 0.3562 | 0.0826 | 0.0270 | 0.3704 |
| U                | 0.0787 | 0.3047 | 0.0787 | 0.2150 | 0.0767 | 0.0000 | 0.3627 |
| Species level    | 0.1108 | 0.2469 | 0.0866 | 0.2588 | 0.1072 | 0.0949 | 0.3682 |
| Population level | 0.1074 | 0.2620 | 0.0881 | 0.2169 | 0.1049 | 0.0698 | 0.3560 |

Polymorphism information content = PIC. PIC < 0.25 means low diversity; 0.25 < PIC < 0.5 means moderate diversity; PIC > 0.5 means high diversity.

<https://doi.org/10.1371/journal.pone.0174868.t004>

diameter and wool crimp, and SNP4 was significantly associated with wool fineness SD ( $P < 0.05$ ). In addition, SNP2 was highly significantly associated with wool fineness SD, and SNP4 was highly significantly associated with and CV of fiber diameter (Table 6,  $P < 0.01$ ). Sheep with the GG genotype of SNP2 had significantly higher average wool fiber diameter and wool fineness SD but significantly lower wool crimp than the sheep with AA genotype

**Table 5. Shannon’s information Index (I) content for the seven identified SNPs in Chinese Merino sheep (Junken Type) population.**

| Strain           | SNP1   | SNP2   | SNP3   | SNP4   | SNP5   | SNP6   | SNP7   |
|------------------|--------|--------|--------|--------|--------|--------|--------|
| A                | 0.0975 | 0.3441 | 0.0716 | 0.1671 | 0.0991 | 0.1671 | 0.6448 |
| B                | 0.2908 | 0.5393 | 0.2664 | 0.3622 | 0.3005 | 0.0307 | 0.6234 |
| PM               | 0.3932 | 0.5874 | 0.2835 | 0.3006 | 0.3672 | 0.1085 | 0.6255 |
| PW               | 0.2017 | 0.3582 | 0.1818 | 0.5924 | 0.2028 | 0.4943 | 0.6920 |
| U                | 0.1769 | 0.5623 | 0.1769 | 0.4101 | 0.1732 | 0.0000 | 0.6690 |
| SF               | 0.1918 | 0.5512 | 0.1687 | 0.6563 | 0.1841 | 0.0732 | 0.6840 |
| Species level    | 0.2347 | 0.4934 | 0.1914 | 0.4835 | 0.2284 | 0.2064 | 0.6797 |
| Population level | 0.2253 | 0.4904 | 0.1915 | 0.4148 | 0.2212 | 0.1456 | 0.6565 |

<https://doi.org/10.1371/journal.pone.0174868.t005>

**Table 6. Effects (least squares means) of FST gene genotypes on wool quality traits.** Only traits associated with the identified SNPs were presented in this table.

| SNP ID <sup>1</sup> | Traits                          | P-value   | Genotype (number)             |                               |
|---------------------|---------------------------------|-----------|-------------------------------|-------------------------------|
|                     |                                 |           | GG (577)                      | AA (139)                      |
| SNP2                | Average wool fiber diameter, μm | 0.0171 *  | 20.6885 (0.0856) <sup>a</sup> | 20.2247 (0.1759) <sup>b</sup> |
|                     | Wool fineness SD, μm            | 0.0035 ** | 4.1803 (0.0295) <sup>a</sup>  | 3.9847 (0.0606) <sup>b</sup>  |
|                     | Wool crimp, crimps / 2.5 cm     | 0.0144 *  | 12.1063 (0.0966) <sup>b</sup> | 12.6436 (0.1985) <sup>a</sup> |
| SNP4                |                                 |           | CC (485)                      | CT (217)                      |
|                     | Wool fineness SD, μm            | 0.0212 *  | 4.1235 (0.0312) <sup>b</sup>  | 4.2738 (0.0580) <sup>a</sup>  |
|                     | CV of fiber diameter, %         | 0.0078 ** | 19.9349 (0.1387) <sup>b</sup> | 20.7057 (0.2575) <sup>a</sup> |

<sup>a, b</sup> Means in a row with different superscripts differ significantly ( $P < 0.05$ ).

<sup>1</sup> ID = identifier.

\*  $P < 0.05$ ;

\*\*  $P < 0.01$ .

<https://doi.org/10.1371/journal.pone.0174868.t006>



**Table 7. Effects (least squares means) of *FST* gene haplotypes on wool quality traits.** Only traits associated with the identified haplotypes were presented in this table.

| Haplotype   | Average wool fiber diameter, $\mu\text{m}$ | Wool fineness SD, $\mu\text{m}$ | CV of fiber diameter, % | Wool crimp, crimps / 2.5 cm |
|-------------|--------------------------------------------|---------------------------------|-------------------------|-----------------------------|
| Haplotype 1 | 0.0044**                                   | 0.0012**                        |                         | 0.0038**                    |
| Haplotype 2 | 0.0019**                                   | 0.0005**                        |                         | 0.0038**                    |
| Haplotype 3 |                                            | 0.0227*                         | 0.023*                  |                             |
| Haplotype 4 |                                            | 0.0331*                         | 0.0248*                 |                             |

\*  $P < 0.05$ ;

\*\*  $P < 0.01$ .

<https://doi.org/10.1371/journal.pone.0174868.t007>

(Table 6,  $P < 0.05$ ). Sheep with the *CC* genotype of SNP4 had significantly lower wool fineness SD and CV of fiber diameter than the sheep with *CT* genotype (Table 6,  $P < 0.05$ ).

### Association of *FST* gene haplotypes with wool quality traits

The LD analysis showed that the seven identified SNPs were very close but not in complete LD (S1 Fig), so the haplotype analysis was conducted in SAS/GENETICS with a sliding window (S1 Table). The haplotype frequencies were showed in S3 Table. Using JMP 7.0, we analyzed the association between *FST* gene haplotypes and wool quality traits using the linear model 2. The effects ( $P$ -value) of the *FST* gene haplotypes on wool quality traits in the tested Chinese Merino sheep population were shown in Table 7. Haplotype 1 (SNP1 and SNP2) and Haplotype 2 (SNP2 and SNP3) were highly significantly associated with average wool fiber diameter, wool fineness SD, and wool crimp (Table 7,  $P < 0.01$ ). Haplotype 3 (SNP3 and SNP4) and Haplotype 4 (SNP4 and SNP5) were significantly associated with wool fineness SD and CV of fiber diameter (Table 7,  $P < 0.05$ ).

### Discussion

Merino and Suffolk have striking difference in wool quality traits. Merino sheep produce the finest and softest wool, while the Suffolk sheep produce coarse wool. Here, we observed that *FST* gene was differentially expressed in the skin between Chinese Merino sheep (SF strain) and Suffolk sheep. SNP and haplotype association analyses showed that *FST* gene polymorphisms were associated with average wool fiber diameter, wool fineness SD, CV of fiber diameter and wool crimp in Chinese Merino sheep (Junken Type).

In the present study, our association analysis showed that *FST* gene was associated with several sheep wool quality traits. *FST* knockout and transgenic mouse studies have shown *FST* regulates hair follicle morphogenesis and cycling [13–16]. Hair or wool is the product of hair follicle which determines hair phenotype [10]. Therefore, we presumed that *FST* affect hair quality phenotype by regulating hair follicle morphogenesis and cycling. *FST* functions by inhibiting activin activity [10]. As expected, knockout and transgenic mouse studies showed that activin A also influences hair follicle morphogenesis and hair phenotype [21, 22, 13]. Considering all the above mentioned observations, it was reasonable to conclude that *FST* gene may be a major gene affecting wool quality traits.

There is a negative correlation between average wool fiber diameter and wool crimp in sheep [23]. In our tested sheep population, SNP2 was significantly associated with both wool fiber diameter and wool crimp. Sheep with the *GG* genotype of SNP2 had significantly higher average wool fiber diameter and wool fineness SD but significantly lower wool crimp than the sheep with *AA* genotype (Table 6,  $P < 0.05$ ). These data suggested that SNP2 could be a

molecular marker for marker-assisted selection (MAS) for high quality wool in sheep. However, this needs validation in large sheep populations.

We observed that SNPs 2 and 3 were not in Hardy-Weinberg equilibrium (Table 3) in the tested Merino population. This phenomenon may be explained by the three possible reasons. First, the number of specific genotypes (AG of SNP2 and CC of SNP3) was too small probable due to genetic drift [24]. Second, the economically favorable traits (such as low average wool fiber diameter) have been artificially selected and SNPs 2 and 3 as the beneficial SNPs or in linkage equilibrium with the beneficial SNPs might have been accumulated [25]. Last, the individual with different genotype may have different environmental adaptability and the individual with low environmental adaptability may be eliminated by natural selection [26].

We previously performed GWAS on the same Chinese Merino sheep (Junken Type) population using the Illumina sheep SNP50 BeadChip [27], but our GWAS results did not detect the association of *FST* gene and wool quality traits. This discrepancy may be due to the low density of Illumina sheep SNP50 BeadChip, the high false negative rate of GWAS [28] or different statistical algorithm [27].

Of these seven identified SNPs, only SNPs 2 and 4 were associated with wool quality traits. These two intronic SNPs may be functional SNPs, or in close linkage with causative alleles that affect *FST* gene expression, resulting in altered wool quality traits. It has been reported that functional intronic SNPs can affect gene expression by several mechanisms. For example, some of these SNPs affect the transcriptional activity by altering transcription factor binding sites and some of them affect mRNA splicing efficiency [29, 30], or instead to alter the expression of alternative transcripts [31, 32]. It is worth investigating whether and how SNPs 2 and 4 affect *FST* gene expression and lead to variations in sheep wool quality traits in the future.

## Conclusions

In this study, a total of seven SNPs were identified in the ovine *FST* gene, and association analysis showed that SNP2 and SNP4 were associated with average wool fiber diameter, wool fineness SD, CV of fiber diameter and wool crimp. SNPs 2 and 4 may be useful for marker-assisted selection for high quality wool in Chinese Merino sheep (Junken Type).

## Supporting information

**S1 Table. The sliding windows for haplotype construction.**

(DOCX)

**S2 Table. Allele and genotype frequencies of the identified SNPs in Chinese Merino sheep (Junken Type).**

(DOCX)

**S3 Table. Haplotype frequencies of the identified SNPs in Chinese Merino sheep (Junken Type).**

(DOCX)

**S1 Fig. LD analysis of the seven identified SNPs in *FST* gene.**

(TIF)

## Author Contributions

**Conceptualization:** GWM NW EGR ZQD SZW HL.

**Data curation:** GWM NW HY EGR.

**Formal analysis:** GWM NW SSX ZQD SZW HL.

**Funding acquisition:** GWM NW HY.

**Investigation:** GWM NW YKC WJZ FYQ SSX.

**Methodology:** GWM NW ZQD SZW HL.

**Project administration:** GWM NW HL.

**Resources:** GWM NW HY.

**Software:** GWM SSX ZQD SZW HL.

**Supervision:** GWM NW HL.

**Validation:** GWM NW.

**Visualization:** GWM NW.

**Writing – original draft:** GWM NW YKC WJZ FYQ.

**Writing – review & editing:** GWM NW YKC WJZ.

## References

1. Shi GQ, Yang YL, Ni JH, Wan PC, Dai R, Zhou P, et al. (2010) Breeding of a new China Merino strain with super-fine wool. *Grass-Feeding Livestock* 2: 4.
2. Chen HY, Zeng XC, Hui WQ, Zhao ZS, Jia B. (2011) Developmental expression patterns and association analysis of sheep KAP8.1 and KAP1.3 genes in Chinese Merino sheep. *INDIAN JOURNAL OF ANIMAL SCIENCES* 81(4): 391–396.
3. Zhou H, Gong H, Li S, Luo Y, Hickford JGH. (2015) A 57-bp deletion in the ovine KAP6-1 gene affects wool fibre diameter. *JOURNAL OF ANIMAL BREEDING AND GENETICS* 132(4): 301–307.
4. Li SB, Zhou HT, Gong H, Zhao FF, Wang JQ, Liu X, et al. (2017) Identification of the Ovine Keratin-Associated Protein 22–1 (KAP22-1) Gene and Its Effect on Wool Traits. *Genes* 8(1).
5. Ling YH, Xiang H, Zhang G, Ding JP, Zhang ZJ, Zhang YH, et al. (2014) Identification of complete linkage disequilibrium in the DSG4 gene and its association with wool length and crimp in Chinese indigenous sheep. *GENETICS AND MOLECULAR RESEARCH* 13(3): 5617–5625.
6. Rong EG, Yang H, Zhang ZW, Wang ZP, Yan XH, Li H, et al. (2015) Association of methionine synthase gene polymorphisms with wool production and quality traits in Chinese Merino population. *Journal of animal science* 93(10): 4601–4609. <https://doi.org/10.2527/jas.2015-8963> PMID: 26523551
7. Robertson DM, Klein R, McLachlan RI, Wettenhall RE, Hearn MT, Burger HG, et al. (1987) The isolation of polypeptides with FSH suppressing activity from bovine follicular fluid which are structurally different to inhibin. *Biochemical and biophysical research communications* 149(2): 744–749. PMID: 3122741
8. Ueno N, Ling N, Ying SY, Esch F, Shimasaki S, Guillemin R. (1987) Isolation and partial characterization of follistatin: a single-chain Mr 35,000 monomeric protein that inhibits the release of follicle-stimulating hormone. *Proceedings of the National Academy of Sciences of the United States of America* 84(23): 8282–8286. PMID: 3120188
9. Tortoriello DV, Sidis Y, Holtzman DA, Holmes WE, Schneyer AL. (2001) Human follistatin-related protein: a structural homologue of follistatin with nuclear localization. *Endocrinology* 142(8): 3426–3434. <https://doi.org/10.1210/endo.142.8.8319> PMID: 11459787
10. McDowall A, Edwards NM, Jahoda CAB, Hynd PI. (2008) The role of activins and follistatins in skin and hair follicle development and function. *Cytokine and Growth Factor Reviews* 19(5–6): 415–426. <https://doi.org/10.1016/j.cytogfr.2008.08.005> PMID: 18922734
11. Patel K. (1998) Follistatin. *The International Journal of Biochemistry and Cell Biology* 30(10): 1087–1093. PMID: 9785474
12. Kondo S, Hashimoto M, Etoh Y, Murata M, Shibai H, Muramatsu M. (1989) Identification of the two types of specific receptor for activin/EDF expressed on Friend leukemia and embryonal carcinoma cells. *Biochemical and Biophysical Research Communications* 161(3): 1267–1272. PMID: 2545199

13. Nakamura M, Matzuk MM, Gerstmayer B, Bosio A, Lauster R, Miyachi Y, et al. (2003) Control of pelage hair follicle development and cycling by complex interactions between follistatin and activin. *FASEB Journal* 17(3): 497–499. <https://doi.org/10.1096/fj.02-0247fje> PMID: 12514121
14. Matzuk MM, Lu N, Vogel H, Sellheyer K, Roop DR, Bradley A. (1995) Multiple defects and perinatal death in mice deficient in follistatin. *Nature* 374(6520): 360–3. <https://doi.org/10.1038/374360a0> PMID: 7885475
15. Guo Q, Kumar TR, Woodruff T, Hadsell LA, DeMayo FJ, Matzuk MM. (1998) Overexpression of mouse follistatin causes reproductive defects in transgenic mice. *Molecular Endocrinology* 12(1): 96–106. <https://doi.org/10.1210/mend.12.1.0053> PMID: 9440814
16. Wankell M, Munz B, Hubner G, Hans W, Wolf E, Goppelt A, et al. (2001) Impaired wound healing in transgenic mice overexpressing the activin antagonist follistatin in the epidermis. *The EMBO Journal* 20(19): 5361–5372. <https://doi.org/10.1093/emboj/20.19.5361> PMID: 11574468
17. Cottle DJ. *International Sheep and Wool Handbook*. Nottingham: Nottingham University Press; 2010.
18. Michael RG, Sambrook J. *Molecular Cloning: A laboratory manual*. 4th ed. New York: Cold Spring Harbor Laboratory Press; 2014.
19. Gabriel S, Ziaugra L, Tabbaa D. (2009) SNP genotyping using the Sequenom MassARRAY iPLEX platform. *Current Protocols in Human Genetics* 2(2): 12.
20. Lembeye F, Castellaro G, Magofke JC, Uribe H. (2014) Phenotypic correlations among economic important traits in Suffolk Down and Merino Precoz sheep in central Chile. *Archivos De Medicina Veterinaria* 46(1): 103–109.
21. Matzuk MM, Kumar TR, Vassalli A, Bickenbach JR, Roop DR, Jaenisch R et al. (1995) Functional analysis of activins during mammalian development. *Nature* 374 (6520): 354–6. <https://doi.org/10.1038/374354a0> PMID: 7885473
22. Jhaveri S, Erzurumlu RS, Chiaia N, Kumar TR, Matzuk MM. (1998) Defective whisker follicles and altered brainstem patterns in activin and follistatin knockout mice. *Molecular and cellular neurosciences* 12(4–5): 206–19. <https://doi.org/10.1006/mcne.1998.0710> PMID: 9828086
23. Naylor G. (1995) Does the fibre diameter distribution of wool consist of a mixture of two components? *Wool Technology and Sheep Breeding* 43: 254–255.
24. Zhang YR, Li YK, Fu CZ, Wang JL, Wang HB, Zan LS. (2014) Effects of bovine SMO gene polymorphisms on the body measurement and meat quality traits of Qinchuan cattle. *GENETICS AND MOLECULAR RESEARCH* 13(4): 8105–8117.
25. Gan W, Song Q, Zhang NN, Xiong XP, Wang DMC, Li L. (2015) Association between FTO polymorphism in exon 3 with carcass and meat quality traits in crossbred ducks. *GENETICS AND MOLECULAR RESEARCH* 14(2): 6699–6714.
26. Correa AM, Pereira MIS, Abreu HKA, Sharon T, Melo CLP, Ito MA, et al. (2016) Selection of common bean genotypes for the Cerrado/Pantanal ecotone via mixed models and multivariate analysis. *GENETICS AND MOLECULAR RESEARCH* 15(4).
27. Wang ZP, Zhang H, Yang H, Wang SZ, Rong EG, Pei WY, et al. (2014) Genome-wide association study for wool production traits in a Chinese Merino sheep population. *Plos One* 9(9): e107101. <https://doi.org/10.1371/journal.pone.0107101> PMID: 25268383
28. Strucken EM, Schmitt AO, Bergfeld U, Jurke I, Reissmann M, Brockmann GA. (2014) Genomewide study and validation of markers associated with production traits in German Landrace boars. *Journal of Animal Science* 92(5): 1939–1944. <https://doi.org/10.2527/jas.2013-7247> PMID: 24671582
29. Jakubauskiene E, Janaviciute V, Peciuliene I, Soderkvist P, Kanopka A. (2012) G/A polymorphism in intronic sequence affects the processing of MAO-B gene in patients with Parkinson disease. *FEBS Letters* 586(20): 3698–3704. <https://doi.org/10.1016/j.febslet.2012.08.028> PMID: 22974659
30. De MP, Merello E, Mascelli S, Raso A, Santamaria A, Ottaviano C, et al. (2006) Mutational screening of the CYP26A1 gene in patients with caudal regression syndrome. *Birth Defects Research Part A-clinical and Molecular Teratology* 76(2): 86–95.
31. Law AJ, Kleinman JE, Weinberger DR, Weickert CS. (2007) Disease-associated intronic variants in the ErbB4 gene are related to altered ErbB4 splice-variant expression in the brain in schizophrenia. *Human Molecular Genetics* 16(2): 129–141. <https://doi.org/10.1093/hmg/ddl449> PMID: 17164265
32. Kawase T, Akatsuka Y, Torikai H, Morishima S, Oka A, Tsujimura A, et al. (2007) Alternative splicing due to an intronic SNP in HMSD generates a novel minor histocompatibility antigen. *Blood* 110(3): 1055–1063. <https://doi.org/10.1182/blood-2007-02-075911> PMID: 17409267
